# Supplementary material for: A highly stable cerium–organic framework: an efficient catalyst for the cycloaddition of CO2 and aziridines under mild-pressure
Source: Royal Society of Chemistry journal article supplement (doi:10.1039/d4ce00167b), 2024-01-01
Supplement: d4ce00167b1.pdf [file d4ce00167b1.pdf]

# A Highly Stable Cerium-Organic Framework: Efficient Catalyst for the Cycloaddition of CO<sub>2</sub> and Aziridines under Mild-Pressure

Tongji Liu, Hang Xu, Ying Shi\*, Bin Zhao\*

Renewable Energy Conversion and Storage Center, Key Laboratory of Advanced Energy Material  
Chemistry, Department of Chemistry, Ministry of Education, Nankai University, Tianjin 300071,  
China;

Email: zhaobin@nankai.edu.cn, yingshi@mail.nankai.edu.cn

## Materials and measurements

Ce(NO<sub>3</sub>)<sub>3</sub>·6H<sub>2</sub>O, CH<sub>3</sub>COONa, Acetic acid, and *N,N*-dimethylacetamide (DMA) were purchased commercially and used without purification. The ligand H<sub>2</sub>DCTP was synthesized according to our previous work.<sup>1</sup> The X-ray crystallography data were acquired on an Oxford Super Nova TM diffractometer equipped with Mo K $\alpha$  monochromatic radiation ( $\lambda = 0.71073$ ) (Table S1). The crystal structure of compound **1** was solved by direct methods and refined by the full-matrix least-squares technique on  $F^2$  with the SHELXS and SHELXL crystallographic program package. All the non-hydrogen atoms were fixed by anisotropic thermal parameters. The CCDC number is 2333439. <sup>1</sup>H nuclear magnetic resonance (<sup>1</sup>H NMR) spectra were conducted in a 400 MHz Bruker 400 spectrometer in CDCl<sub>3</sub>. Fourier transform infrared (FT-IR) spectra were performed on the Nicolet IS10 instrument. Powder X-ray diffraction (PXRD) was carried out with an Ultima IV X-ray diffractometer with Cu-K $\alpha$  radiation. Thermogravimetric analysis was obtained by an EVO2G-TG TG-DTA analyzer under the air atmosphere. X-ray photoelectron spectroscopy (XPS) analyses were recorded on Thermo Scientific ESCALab250xi.

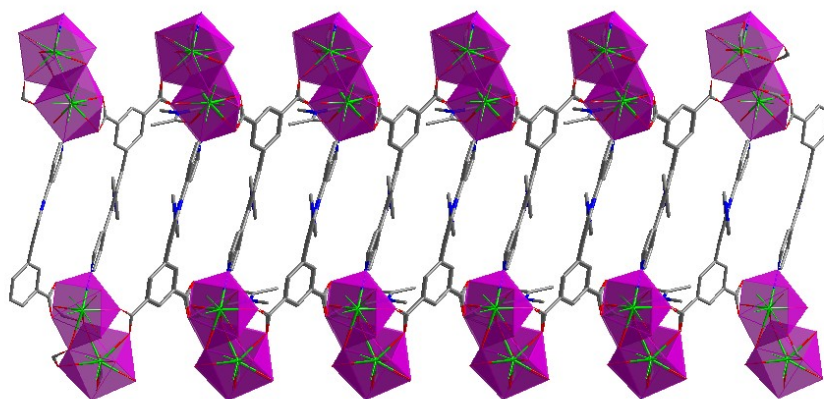

**Figure S1.** The pore structure diagram of **1** on the (1,1,0) crystal plane.

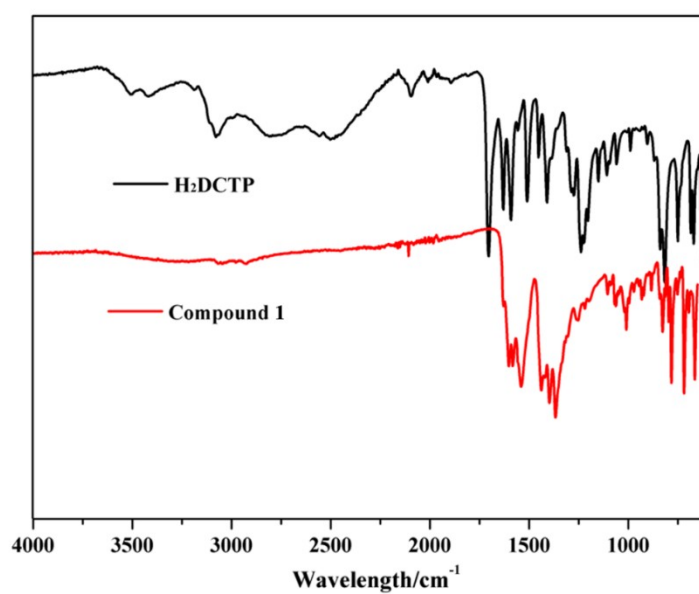

**Figure S2.** Infrared spectra compound **1** and H<sub>2</sub>DCTP.

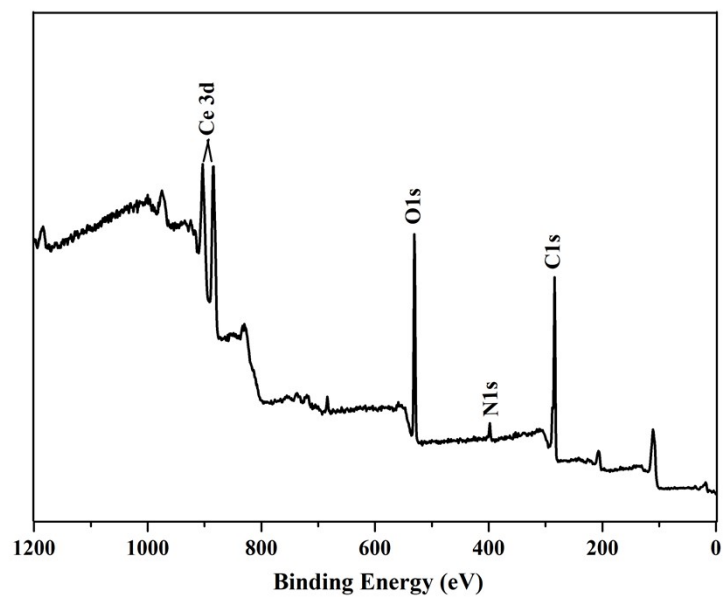

**Figure S3.** The full survey XPS spectrum of compound **1**.

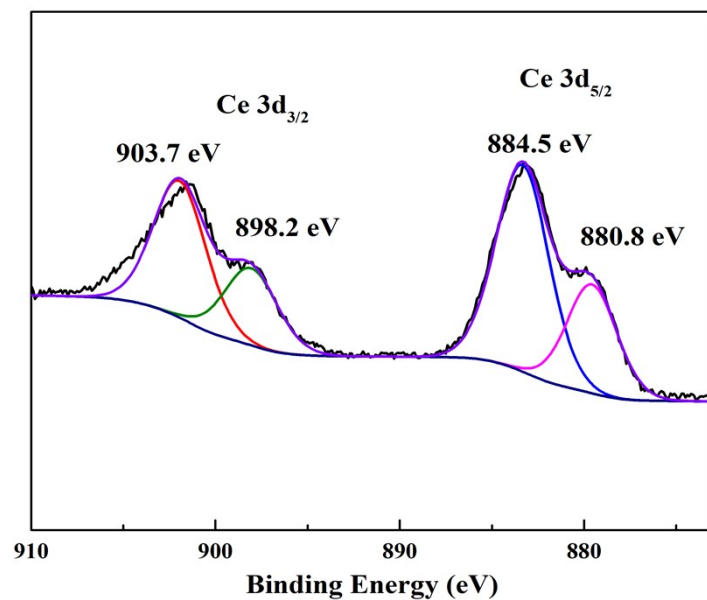

**Figure S4.** Ce 3d XPS spectrum in compound **1**.

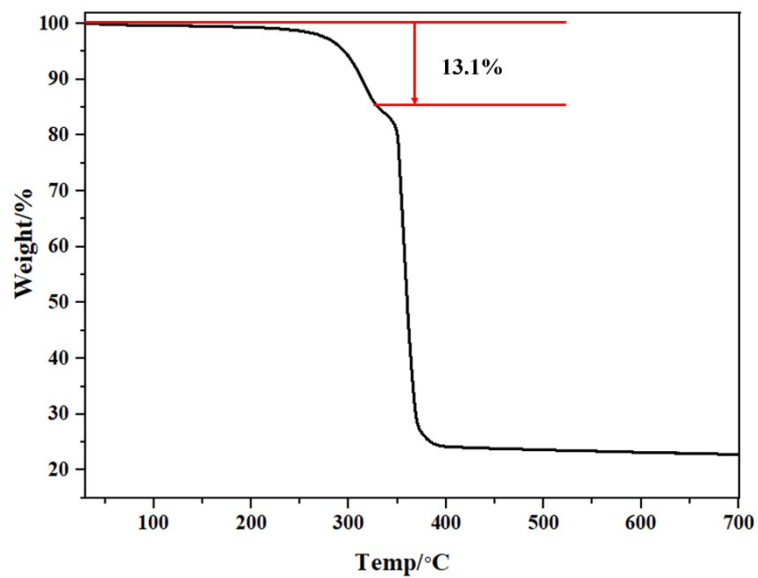

Figure S5. Thermogravimetric analysis of compound 1.

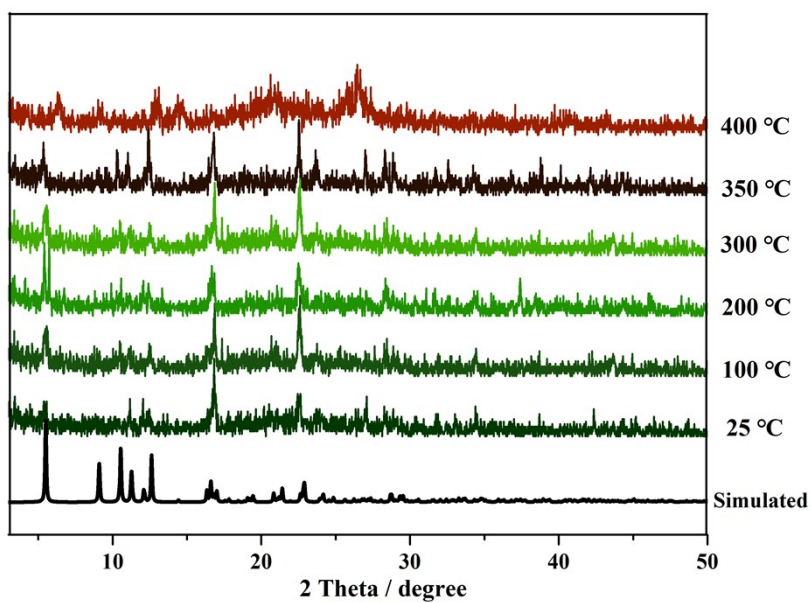

Figure S6. PXRD pattern of compound 1 heating at different temperatures.

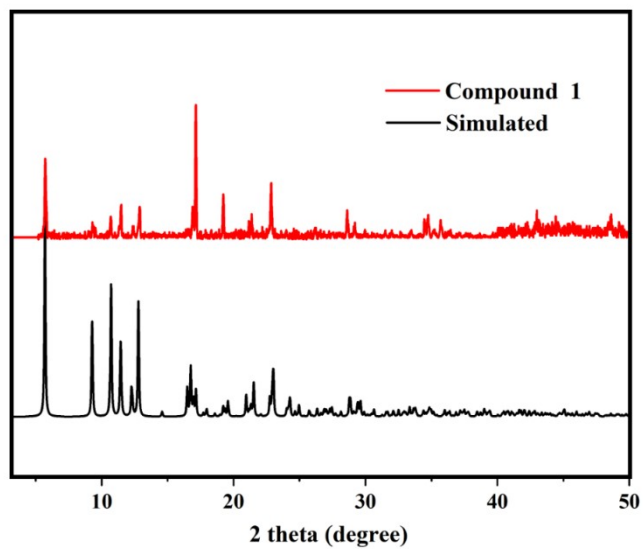

**Figure S7.** Powder diffraction data of compound 1.

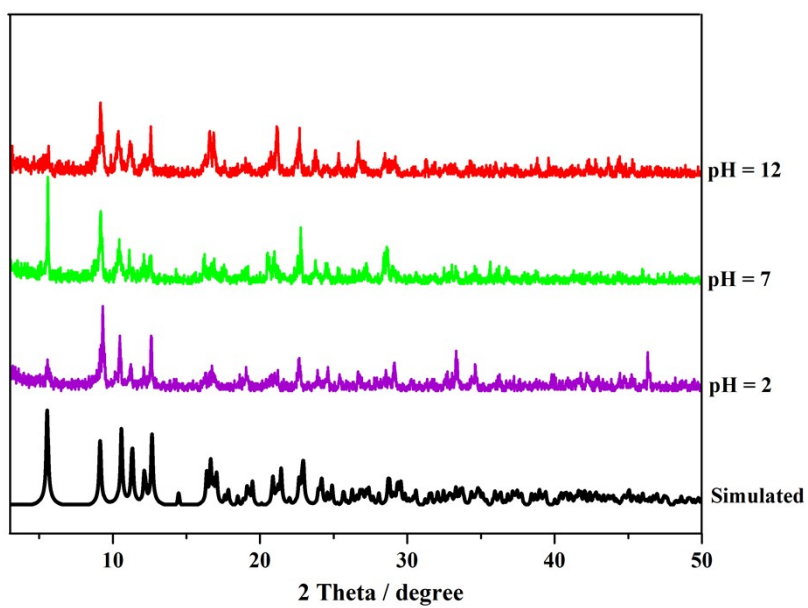

**Figure S8.** PXRD pattern of compound 1 after immersing in pH solution for 72 hours.

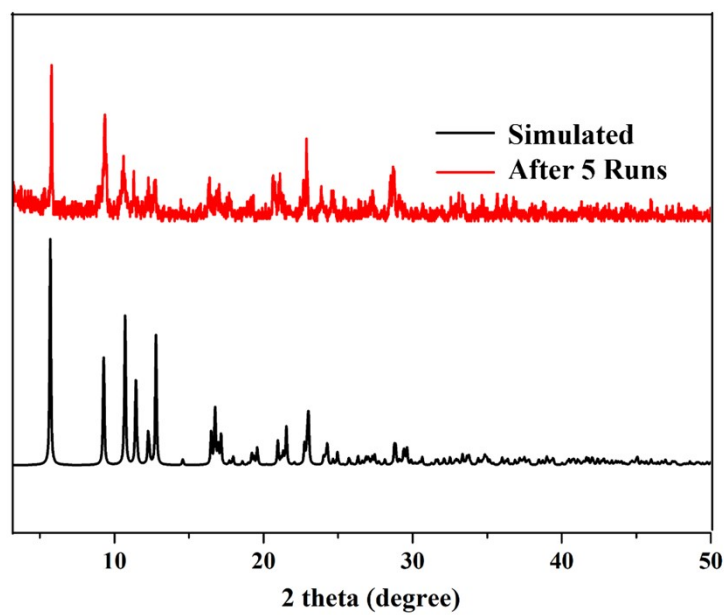

**Figure S9.** Powder diffraction data of **1** after five cycles.

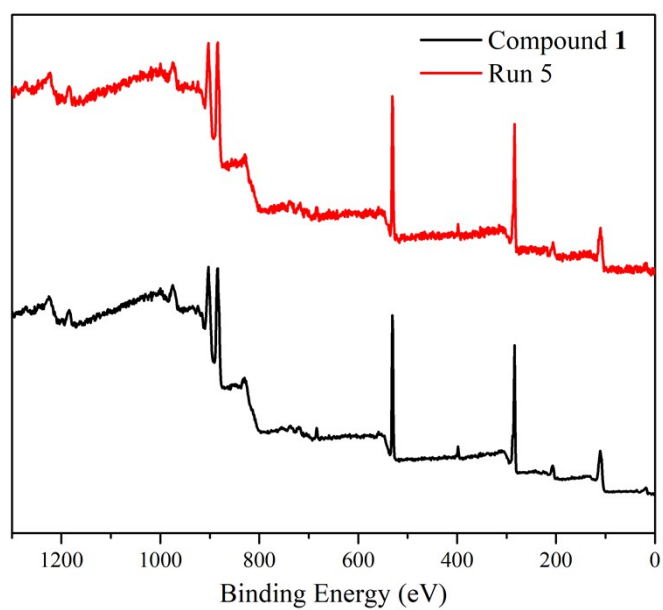

**Figure S10.** The full survey XPS spectrum of **1** before and after the reaction.

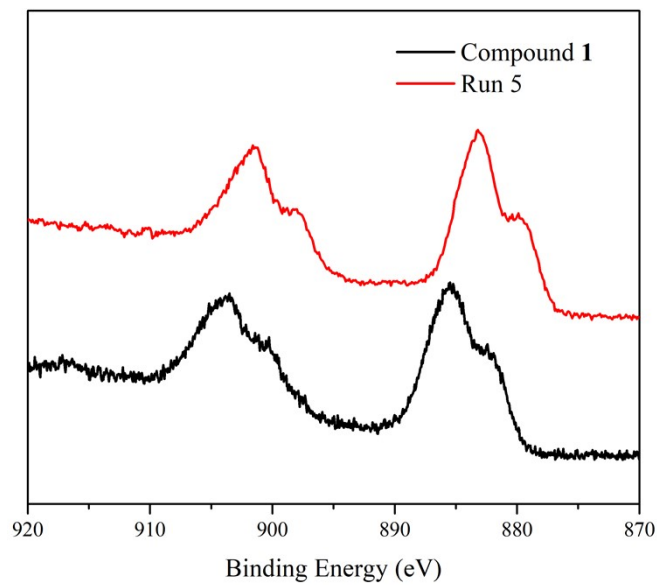

**Figure S11.** Ce 3d XPS spectrum of **1** before and after the reaction.

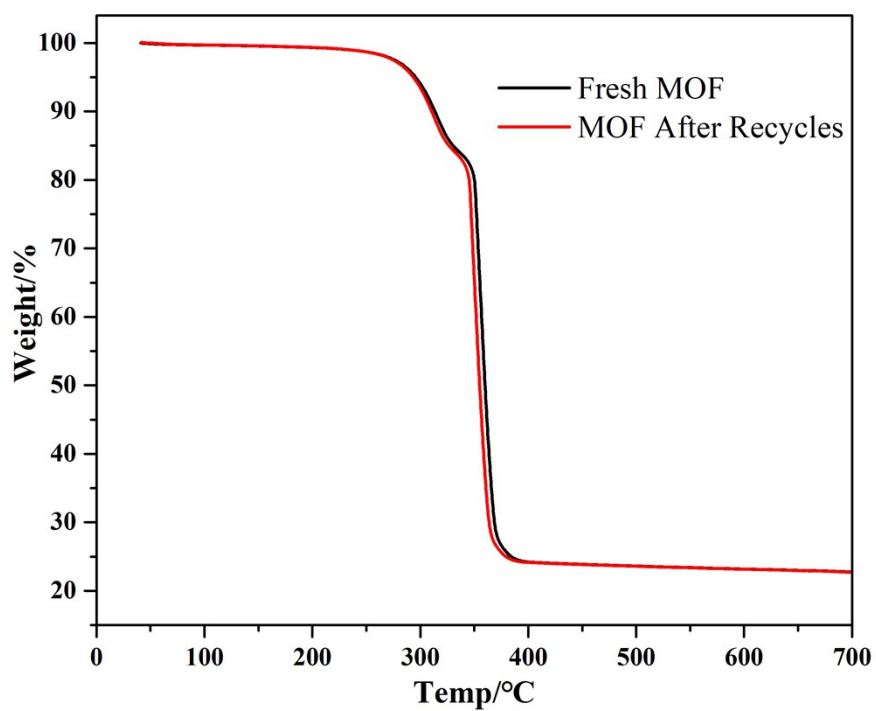

**Figure S12.** Thermogravimetric analysis of compound **1** before and after recycle.



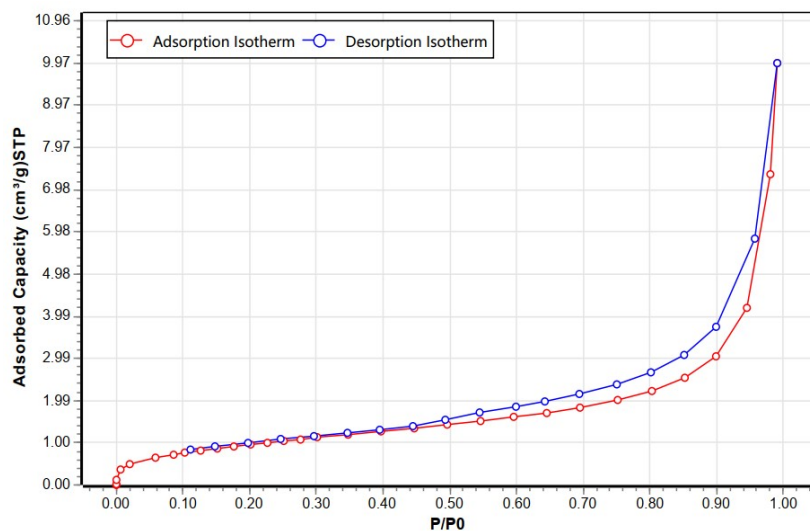

**Figure S13.** CO<sub>2</sub> adsorption-desorption of compound **1**.

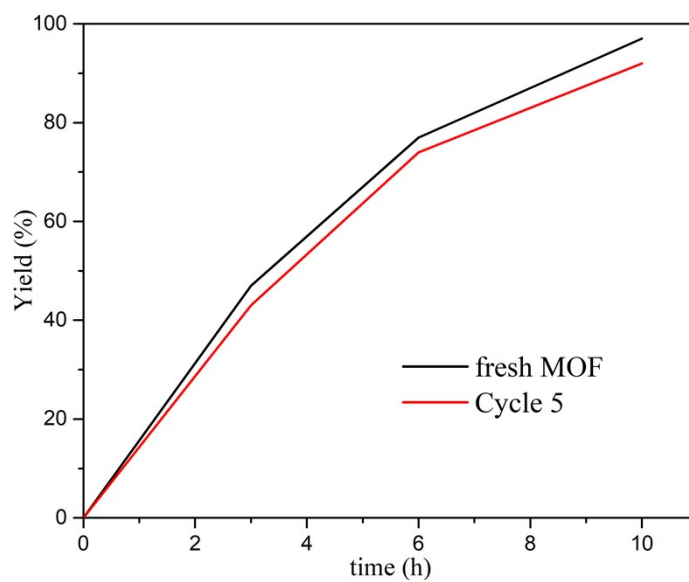

**Figure S14.** Kinetic curves of compound **1** for the reaction.

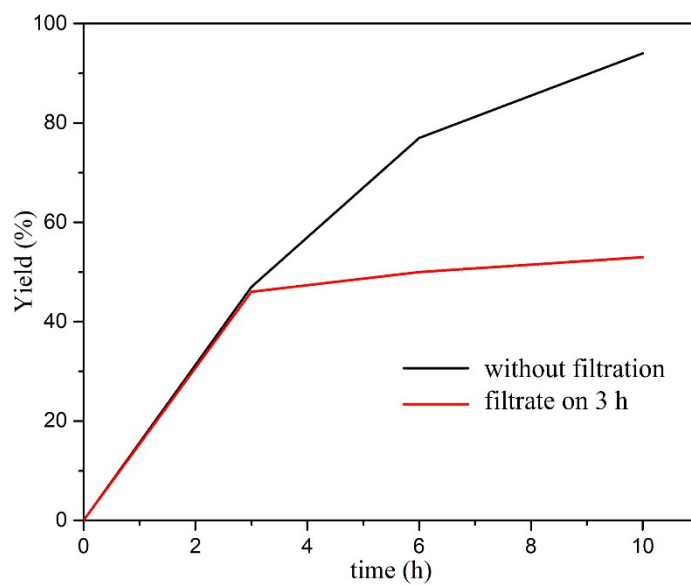

**Figure S15.** The hot filtration experiment of **1**.

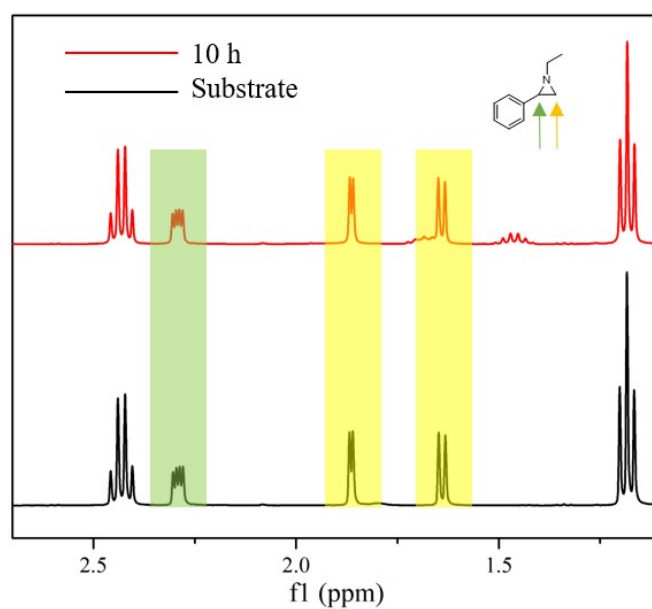

**Figure S16.** The activation of the aziridine substrate,  $\text{Ce}(\text{NO}_3)_3$  and ligand after 10 h by  $^1\text{H}$  NMR spectra.

**Table S1.** Crystal data and structure refinement details for crystal **1**.

| Compound                            | <b>1</b>                                                         |
|-------------------------------------|------------------------------------------------------------------|
| Formula                             | C <sub>29</sub> H <sub>25</sub> CeN <sub>4</sub> O <sub>7</sub>  |
| Mr.                                 | 681.65                                                           |
| Temperature (K)                     | 293.00                                                           |
| Cryst. Syst.                        | monoclinic                                                       |
| Space group                         | <i>C2/c</i>                                                      |
| <i>a</i> (Å)                        | 20.0128(4)                                                       |
| <i>b</i> (Å)                        | 9.15790(10)                                                      |
| <i>c</i> (Å)                        | 32.5211(8)                                                       |
| $\alpha$ (°)                        | 90                                                               |
| $\beta$ (°)                         | 107.560(2)                                                       |
| $\gamma$ (°)                        | 90                                                               |
| Volume (Å <sup>3</sup> )            | 5682.6(2)                                                        |
| <i>Z</i>                            | 8                                                                |
| $\mu$ (mm <sup>-1</sup> )           | 1.655                                                            |
| <i>F</i> (000)                      | 2728                                                             |
| $2\theta$ (°)                       | 5.9 to 50.016                                                    |
| Reflections collected               | 6473                                                             |
| Independent Refl.                   | 4110 [ $R_{\text{int}} = 0.0193$ , $R_{\text{sigma}} = 0.0330$ ] |
| Data/restraints/parameters          | 4110 / 0 / 374                                                   |
| GOF on $F^2$                        | 1.032                                                            |
| $R_1$ , $wR_2$ [ $I > 2\sigma(I)$ ] | $R_1 = 0.0251$ , $wR_2 = 0.0568$                                 |
| $R_1$ , $wR_2$ (all data)           | $R_1 = 0.0272$ , $wR_2 = 0.0583$                                 |

**Table S2.** Bond Lengths for **1**.

| Bond                | Length/Å | Bond    | Length/Å |
|---------------------|----------|---------|----------|
| Ce1-O5              | 2.471(2) | N3-C16  | 1.324(5) |
| Ce1-O6              | 2.591(2) | N1-C23  | 1.326(5) |
| Ce1-O6 <sup>1</sup> | 2.655(2) | N1-C22  | 1.342(4) |
| Ce1-O4 <sup>2</sup> | 2.447(2) | C2-C3   | 1.394(4) |
| Ce1-O2 <sup>3</sup> | 2.516(2) | C2-C7   | 1.387(5) |
| Ce1-O7 <sup>1</sup> | 2.555(2) | C2-C1   | 1.496(5) |
| Ce1-O3 <sup>4</sup> | 2.447(2) | C8-C4   | 1.503(4) |
| Ce1-O1 <sup>3</sup> | 2.561(2) | C14-C18 | 1.393(5) |
| Ce1-N1              | 2.705(3) | C14-C11 | 1.495(5) |
| O5-C26              | 1.244(4) | C10-C9  | 1.393(5) |
| O6-Ce1 <sup>1</sup> | 2.655(2) | C3-C4   | 1.384(4) |
| O6-C29              | 1.280(4) | C4-C5   | 1.386(5) |
| O4-Ce1 <sup>2</sup> | 2.447(2) | C12-C13 | 1.386(5) |
| O4-C8               | 1.264(4) | C12-C20 | 1.493(4) |
| O2-Ce1 <sup>3</sup> | 2.516(2) | C5-C6   | 1.398(4) |
| O2-C1               | 1.269(4) | C7-C6   | 1.396(4) |
| O7-Ce1 <sup>1</sup> | 2.555(2) | C19-C23 | 1.382(5) |
| O7-C29              | 1.249(4) | C19-C20 | 1.394(5) |
| O3-Ce1 <sup>5</sup> | 2.447(2) | C18-C17 | 1.380(5) |
| O3-C8               | 1.256(4) | C6-C9   | 1.488(5) |
| O1-Ce1 <sup>3</sup> | 2.561(2) | N3-C17  | 1.343(5) |
| O1-C1               | 1.261(4) | C21-C22 | 1.379(5) |
| N4-C24              | 1.447(5) | C29-C28 | 1.506(5) |
| N4-C25              | 1.476(5) | C27-C26 | 1.495(5) |
| N4-C26              | 1.317(5) | C13-C9  | 1.392(4) |
| N2-C12              | 1.351(4) | C16-C15 | 1.387(5) |
| N2-C11              | 1.341(4) | C21-C20 | 1.373(5) |

<sup>1</sup>1-X,+Y,1/2-Z; <sup>2</sup>1/2-X,1/2-Y,-Z; <sup>3</sup>1-X,1-Y,-Z; <sup>4</sup>1/2+X,1/2-Y,1/2+Z; <sup>5</sup>-1/2+X,1/2-Y,-1/2+Z

**Table S3.** Angle for **1**.

| Atom                   | Angle/°   | Atom                    | Angle/°   | Atom       | Angle/°  |
|------------------------|-----------|-------------------------|-----------|------------|----------|
| O5-Ce1-O6 <sup>1</sup> | 147.14(7) | C29-O6-Ce1 <sup>1</sup> | 91.8(2)   | O2-C1-C2   | 118.0(3) |
| O5-Ce1-O6              | 139.22(7) | C8-O4-Ce1 <sup>3</sup>  | 138.5(2)  | O1-C1-O2   | 122.2(3) |
| O5-Ce1-O2 <sup>2</sup> | 85.90(8)  | C1-O2-Ce1 <sup>2</sup>  | 92.54(18) | O1-C1-C2   | 119.8(3) |
| O5-Ce1-O7 <sup>1</sup> | 143.61(8) | C29-O7-Ce1 <sup>1</sup> | 97.26(19) | O6-C29-C28 | 119.9(3) |
| O5-Ce1-O1 <sup>2</sup> | 69.02(8)  | C8-O3-Ce1 <sup>5</sup>  | 130.5(2)  | O7-C29-O6  | 120.9(3) |
| O5-Ce1-N1              | 80.59(8)  | C1-O1-Ce1 <sup>2</sup>  | 90.7(2)   | O7-C29-C28 | 119.2(3) |
| O6-Ce1-O6 <sup>1</sup> | 62.68(8)  | C24-N4-C25              | 114.1(3)  | N3-C17-C18 | 124.3(4) |
| O6-Ce1-N1              | 139.27(8) | C26-N4-C24              | 127.1(4)  | C12-C13-C9 | 119.5(3) |

|                                      |           |             |          |                                      |           |
|--------------------------------------|-----------|-------------|----------|--------------------------------------|-----------|
| O6 <sup>1</sup> -Ce1-N1              | 77.95(8)  | C26-N4-C25  | 118.8(3) | N3-C16-C15                           | 124.8(3)  |
| O4 <sup>3</sup> -Ce1-O5              | 78.78(8)  | C11-N2-C12  | 117.9(3) | N1-C23-C19                           | 124.1(3)  |
| O4 <sup>3</sup> -Ce1-O6 <sup>1</sup> | 70.68(7)  | C16-N3-C17  | 115.5(3) | O5-C26-N4                            | 122.1(4)  |
| O4 <sup>3</sup> -Ce1-O6              | 103.83(7) | C23-N1-Ce1  | 121.1(2) | O5-C26-C27                           | 119.6(3)  |
| O4 <sup>3</sup> -Ce1-O2 <sup>2</sup> | 155.60(7) | C23-N1-C22  | 116.2(3) | N4-C26-C27                           | 118.3(4)  |
| O4 <sup>3</sup> -Ce1-O7 <sup>1</sup> | 115.19(7) | C22-N1-Ce1  | 122.3(2) | C20-C21-C22                          | 120.1(3)  |
| O4 <sup>3</sup> -Ce1-O3 <sup>4</sup> | 76.88(7)  | C3-C2-C1    | 119.3(3) | C19-C20-C12                          | 122.8(3)  |
| O4 <sup>3</sup> -Ce1-O1 <sup>2</sup> | 135.46(7) | C7-C2-C3    | 119.5(3) | C21-C20-C12                          | 120.4(3)  |
| O4 <sup>3</sup> -Ce1-N1              | 70.17(8)  | C7-C2-C1    | 121.2(3) | C21-C20-C19                          | 116.8(3)  |
| O2 <sup>2</sup> -Ce1-O6 <sup>1</sup> | 126.91(7) | O4-C8-C4    | 117.9(3) | N2-C11-C14                           | 115.4(3)  |
| O2 <sup>2</sup> -Ce1-O6              | 75.83(7)  | O3-C8-O4    | 124.9(3) | N2-C11-C10                           | 122.5(3)  |
| O2 <sup>2</sup> -Ce1-O7 <sup>1</sup> | 88.32(8)  | O3-C8-C4    | 117.2(3) | C10-C11-C14                          | 122.1(3)  |
| O2 <sup>2</sup> -Ce1-O1 <sup>2</sup> | 51.74(7)  | C18-C14-C11 | 120.6(3) | N1-C22-C21                           | 123.5(4)  |
| O2 <sup>2</sup> -Ce1-N1              | 126.08(8) | C15-C14-C18 | 116.9(3) | C10-C9-C6                            | 120.4(3)  |
| O7 <sup>1</sup> -Ce1-O6              | 72.83(7)  | C15-C14-C11 | 122.5(3) | C13-C9-C10                           | 117.5(3)  |
| O7 <sup>1</sup> -Ce1-O6 <sup>1</sup> | 49.91(7)  | C11-C10-C9  | 119.8(3) | C13-C9-C6                            | 122.0(3)  |
| O7 <sup>1</sup> -Ce1-O1 <sup>2</sup> | 79.30(8)  | C4-C3-C2    | 120.5(3) | C14-C15-C16                          | 119.2(4)  |
| O7 <sup>1</sup> -Ce1-N1              | 74.07(8)  | C3-C4-C8    | 119.1(3) | C5-C6-C9                             | 121.2(3)  |
| O3 <sup>4</sup> -Ce1-O5              | 71.83(8)  | C3-C4-C5    | 119.3(3) | C7-C6-C5                             | 118.4(3)  |
| O3 <sup>4</sup> -Ce1-O6 <sup>1</sup> | 111.38(7) | C5-C4-C8    | 121.6(3) | C7-C6-C9                             | 120.4(3)  |
| O3 <sup>4</sup> -Ce1-O6              | 69.37(7)  | N2-C12-C13  | 122.6(3) | C23-C19-C20                          | 119.2(3)  |
| O3 <sup>4</sup> -Ce1-O2 <sup>2</sup> | 80.37(8)  | N2-C12-C20  | 114.4(3) | C17-C18-C14                          | 119.3(4)  |
| O3 <sup>4</sup> -Ce1-O7 <sup>1</sup> | 142.12(8) | C13-C12-C20 | 123.0(3) | O1 <sup>2</sup> -Ce1-O6 <sup>1</sup> | 127.23(7) |
| O3 <sup>4</sup> -Ce1-O1 <sup>2</sup> | 118.51(7) | C4-C5-C6    | 121.2(3) | O1 <sup>2</sup> -Ce1-O6              | 120.68(7) |
| O3 <sup>4</sup> -Ce1-N1              | 140.39(8) | C2-C7-C6    | 120.8(3) | O1 <sup>2</sup> -Ce1-N1              | 74.79(8)  |

<sup>1</sup>1-X,+Y,1/2-Z; <sup>2</sup>1-X,1-Y,-Z; <sup>3</sup>1/2-X,1/2-Y,-Z; <sup>4</sup>1/2+X,1/2-Y,1/2+Z; <sup>5</sup>1/2+X,1/2-Y,-1/2+Z

**Table S4.** ICP results of fresh catalyst

| Ce-MOF                          | Ce <sup>3+</sup> (ppm) |
|---------------------------------|------------------------|
| Filter liquor of fresh catalyst | 1.32                   |

**Table S5.** ICP results of reaction filtrate

| Ce-MOF                                  | Ce <sup>3+</sup> (ppm) |
|-----------------------------------------|------------------------|
| Filter liquor after catalytic recycling | 0.3542                 |

## 1-ethyl-2-phenylaziridine

$^1\text{H}$  NMR (400 MHz,  $\text{CDCl}_3$ )  $\delta$  7.55 – 7.27 (m, 5H), 5.61 (t,  $J = 8.1$  Hz, 1H), 4.05 (t,  $J = 8.7$  Hz, 1H), 3.59 – 3.36 (m, 3H), 1.31 (t,  $J = 7.3$  Hz, 3H);  $^{13}\text{C}$  NMR (101 MHz,  $\text{CDCl}_3$ )  $\delta$  158.18 (s), 139.37 (s), 129.35 (d,  $J = 12.7$  Hz), 126.02 (s), 77.86 (s), 77.54 (s), 77.22 (s), 74.81 (s), 52.12 (s), 39.44 (s), 13.10 (s).

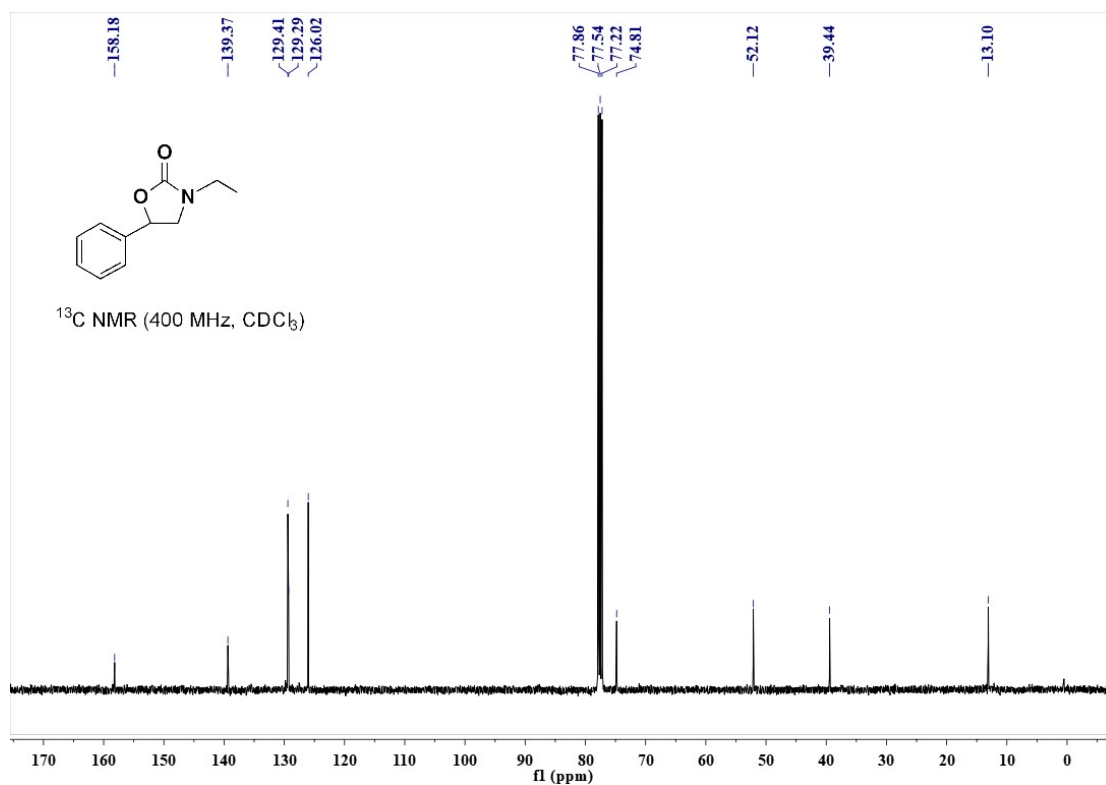

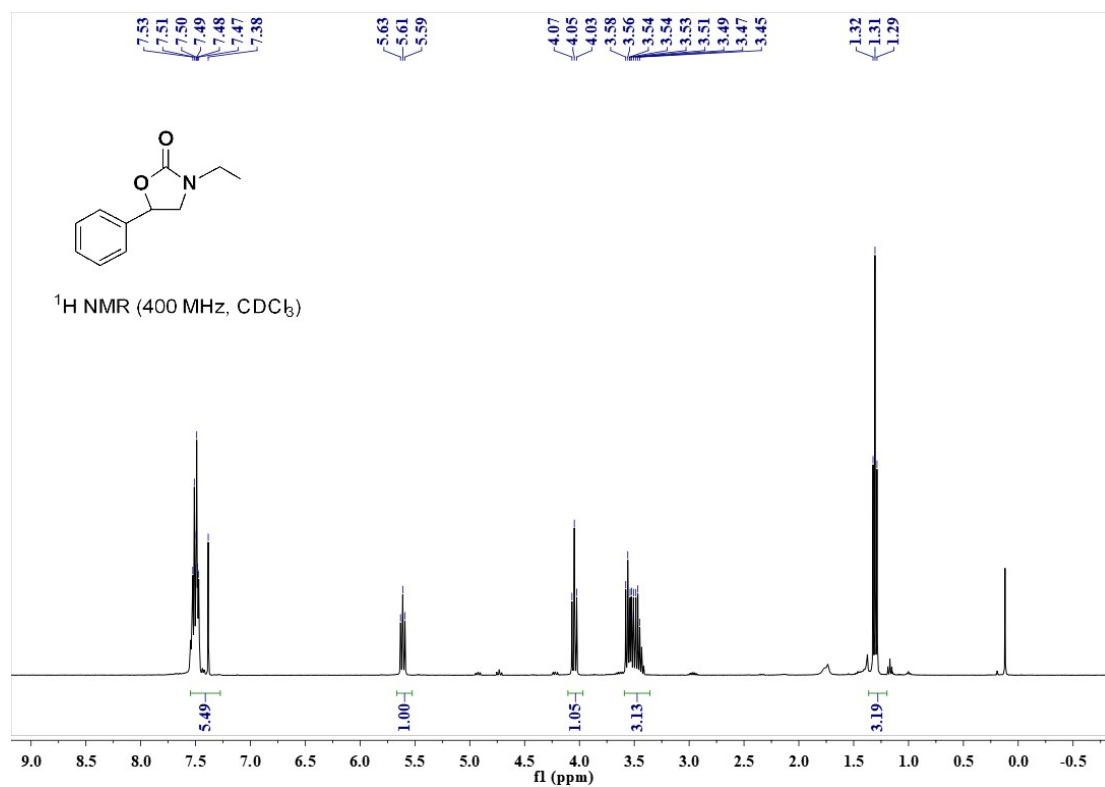

### 1-propyl-2-phenylaziridine

$^1\text{H NMR}$  (400 MHz,  $\text{CDCl}_3$ )  $\delta$  7.47 – 7.33 (m, 5H), 5.65 – 5.61 (t,  $J = 8.1$  Hz, 1H), 4.06 – 4.04 (t,  $J = 8.7$  Hz, 1H), 3.57 – 3.55 (m, 1H), 3.41 – 3.40 (m, 1H), 1.75 – 1.68 (t,  $J = 7.6$  Hz, 2H), 1.08 (t,  $J = 7.3$  Hz, 3H);  $^{13}\text{C NMR}$  (101 MHz,  $\text{CDCl}_3$ )  $\delta$  158.60 (s), 139.54 (s), 129.51 (s), 126.10 (s), 77.97 (s), 77.65 (s), 77.34 (s), 74.91 (s), 52.78 (s), 46.44 (s), 21.28 (s), 11.70 (s).



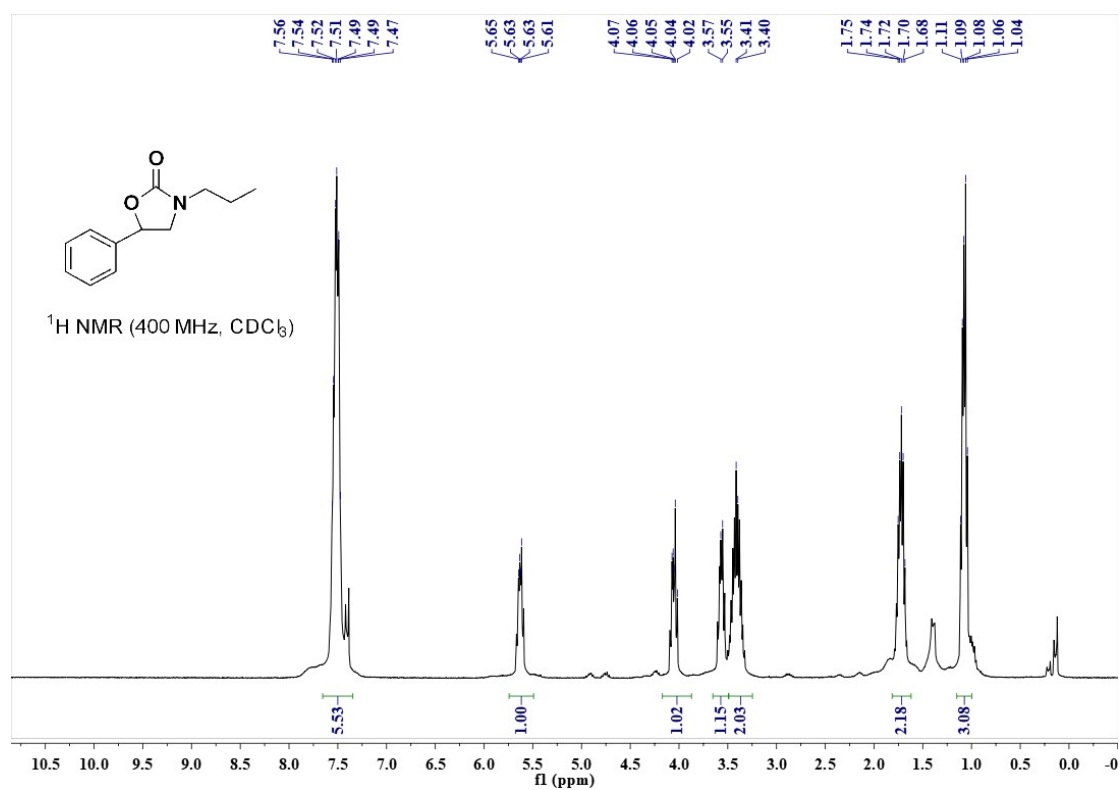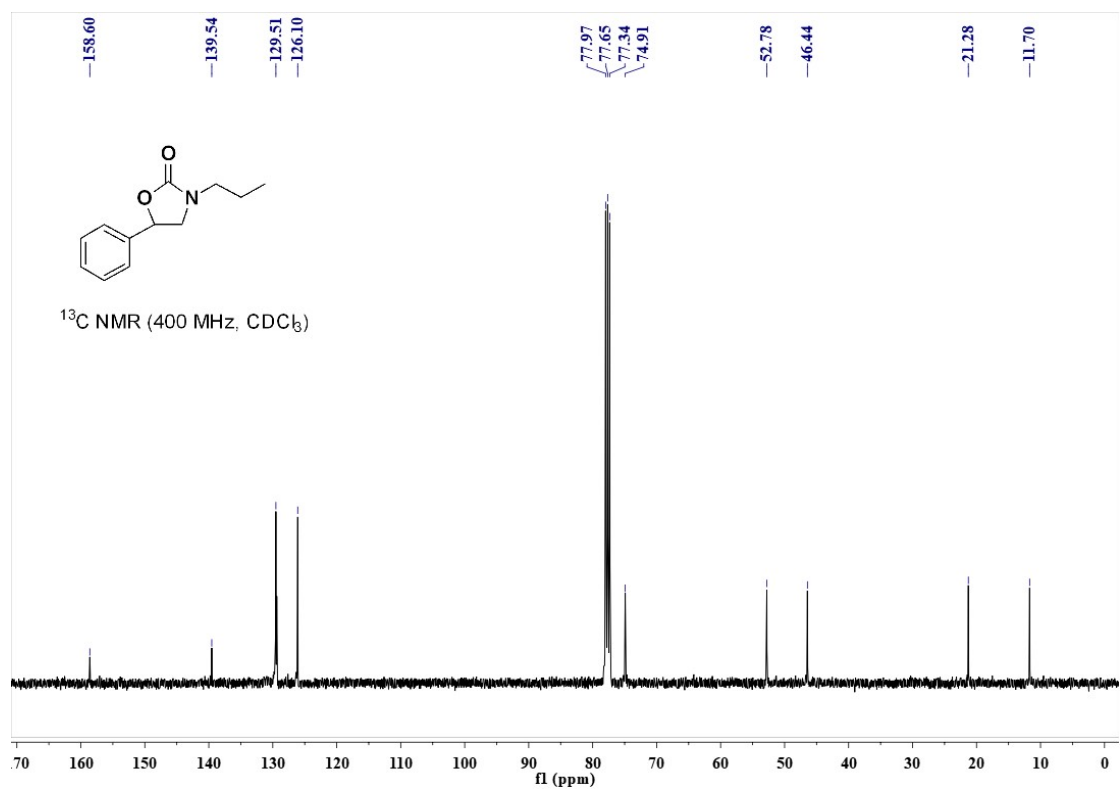

### 1-butyl-2-phenylaziridine

<sup>1</sup>H NMR (400 MHz, CDCl<sub>3</sub>) δ 7.51 – 7.32 (m, 5H), 5.62 – 5.43 (m, 1H), 3.98 (t, *J* =

8.7 Hz, 1H), 3.50 (dd,  $J = 8.6, 7.5$  Hz, 1H), 3.37 (dtd,  $J = 21.1, 13.9, 6.9$  Hz, 2H), 1.69 – 1.53 (m, 2H), 1.47 – 1.28 (m, 3H), 1.01 (t,  $J = 7.3$  Hz, 3H);  $^{13}\text{C}$  NMR (101 MHz,  $\text{CDCl}_3$ )  $\delta$  158.12 (s), 139.12 (s), 129.03 (d,  $J = 13.7$  Hz), 125.70 (s), 77.55 (s), 77.23 (s), 77.23 (s), 76.92 (s), 74.51 (s), 52.38 (s), 44.13 (s), 29.62 (s), 20.04 (s), 13.90 (s).

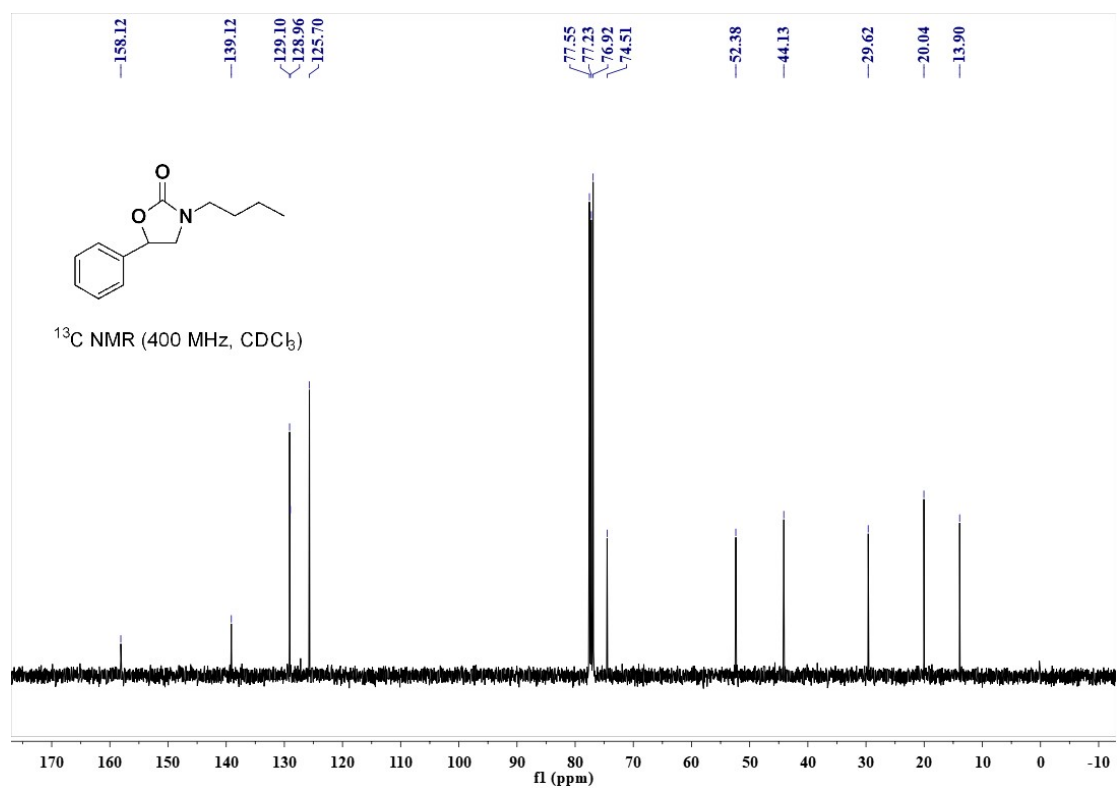

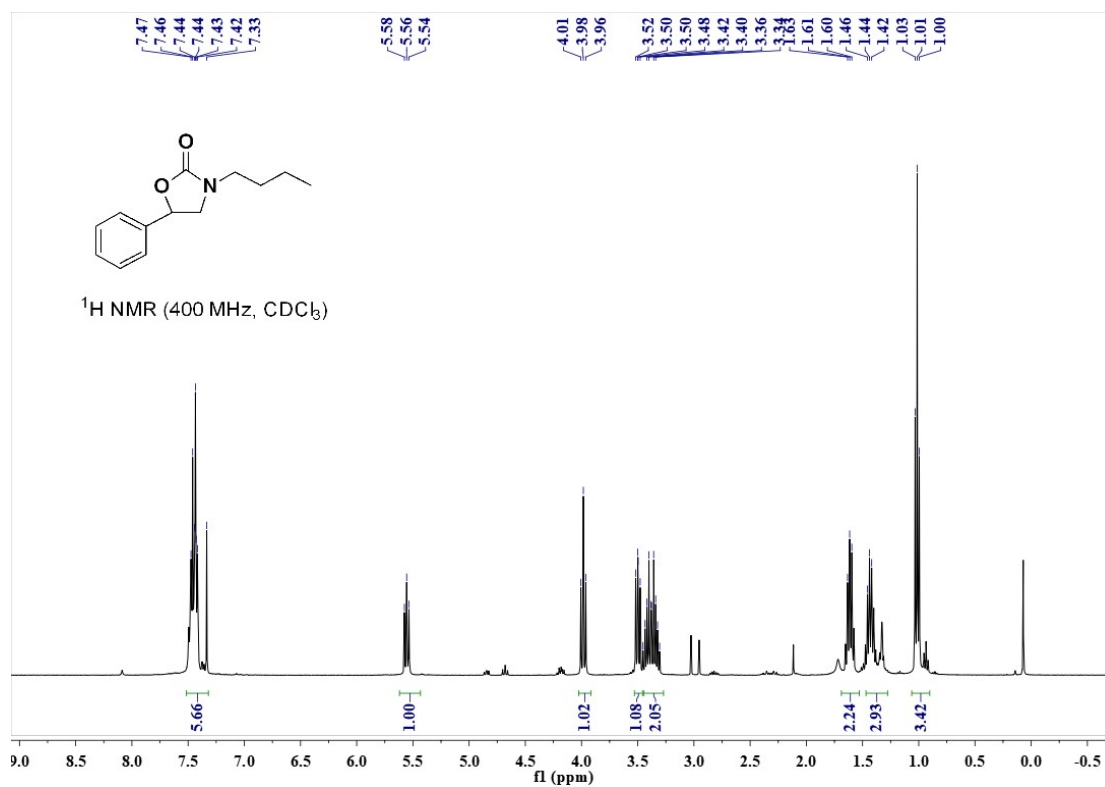

### 1-amyl-2-phenylaziridine

<sup>1</sup>H NMR (400 MHz, CDCl<sub>3</sub>)  $\delta$  7.49 – 7.34 (m, 5H), 5.57 (t,  $J$  = 8.1 Hz, 1H), 3.99 (t,  $J$  = 8.7 Hz, 1H), 3.56 – 3.44 (m, 1H), 3.38 (ddd,  $J$  = 21.2, 13.8, 6.6 Hz, 2H), 1.65 (dd,  $J$  = 14.6, 7.3 Hz, 2H), 1.44 – 1.34 (m, 4H), 0.98 (t,  $J$  = 6.9 Hz, 3H); <sup>13</sup>C NMR (101 MHz, CDCl<sub>3</sub>)  $\delta$  139.54 (s), 129.44 (d,  $J$  = 13.6 Hz), 126.10 (s), 77.94 (s), 77.62 (s), 77.31 (s), 74.91 (s), 52.79 (s), 44.80 (s), 29.36 (s), 27.64 (s), 22.90 (s), 14.57 (s).

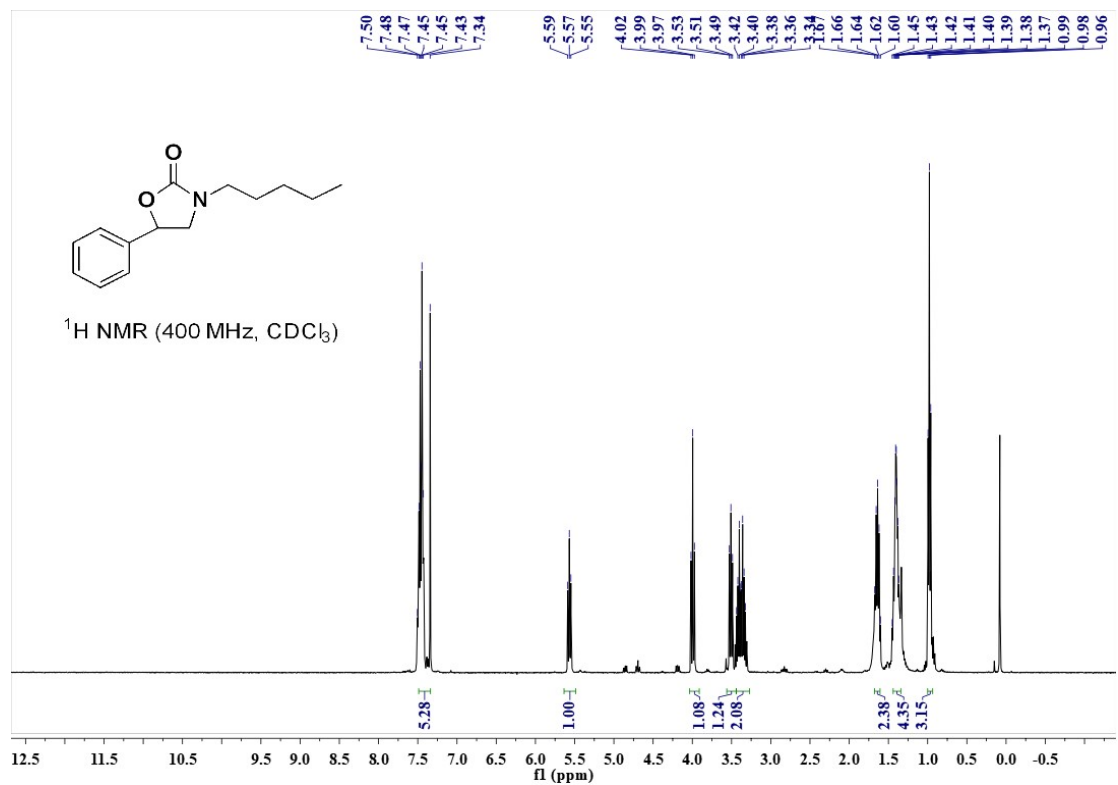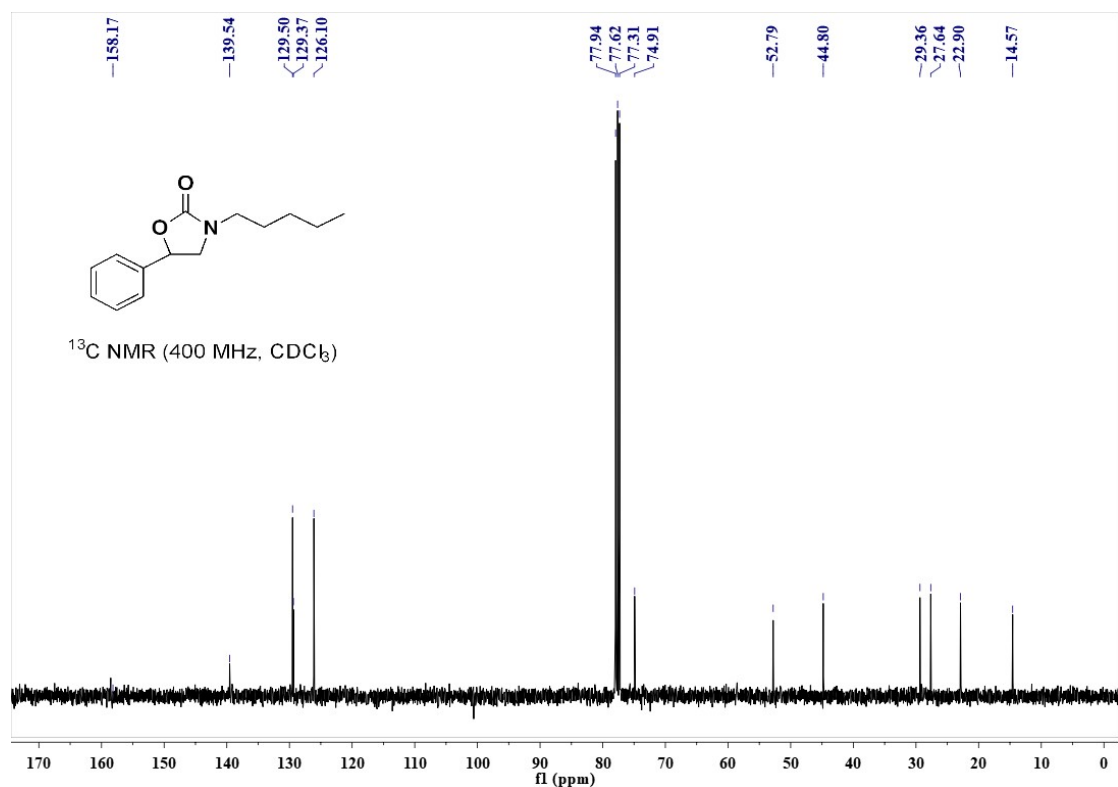

## 2-(4-methylphenyl)-1-ethylaziridine

<sup>1</sup>H NMR (400 MHz, CDCl<sub>3</sub>) δ 7.31 – 7.19 (m, 5H), 5.49 (q, *J* = 8.3 Hz, 1H), 3.93 (q, *J* = 8.8 Hz, 1H), 3.56 – 3.21 (m, 3H), 2.40 (d, *J* = 8.6 Hz, 3H); <sup>13</sup>C NMR (101 MHz,

$\text{CDCl}_3$   $\delta$  139.52 (s), 136.63 (s), 130.35 (s), 126.39 (s), 78.15 (s), 77.83 (s), 77.51 (s),  
75.16 (s), 52.46 (s), 39.72 (s), 22.00 (s), 13.41 (s).

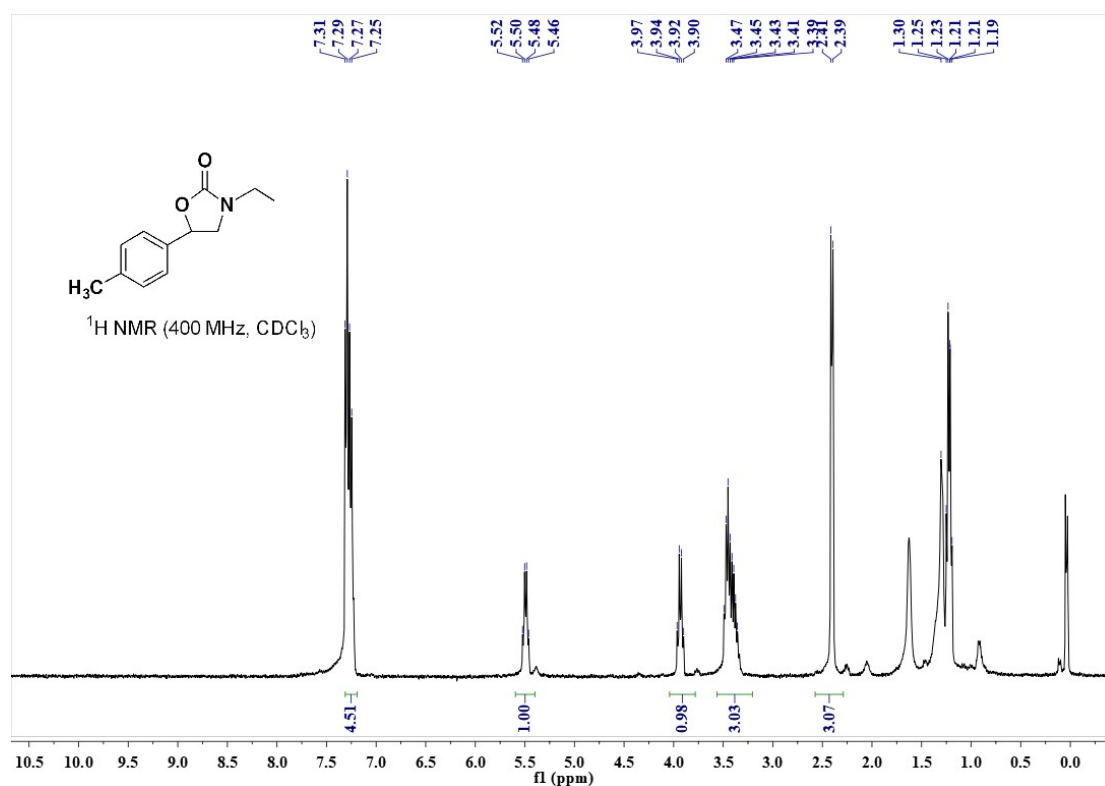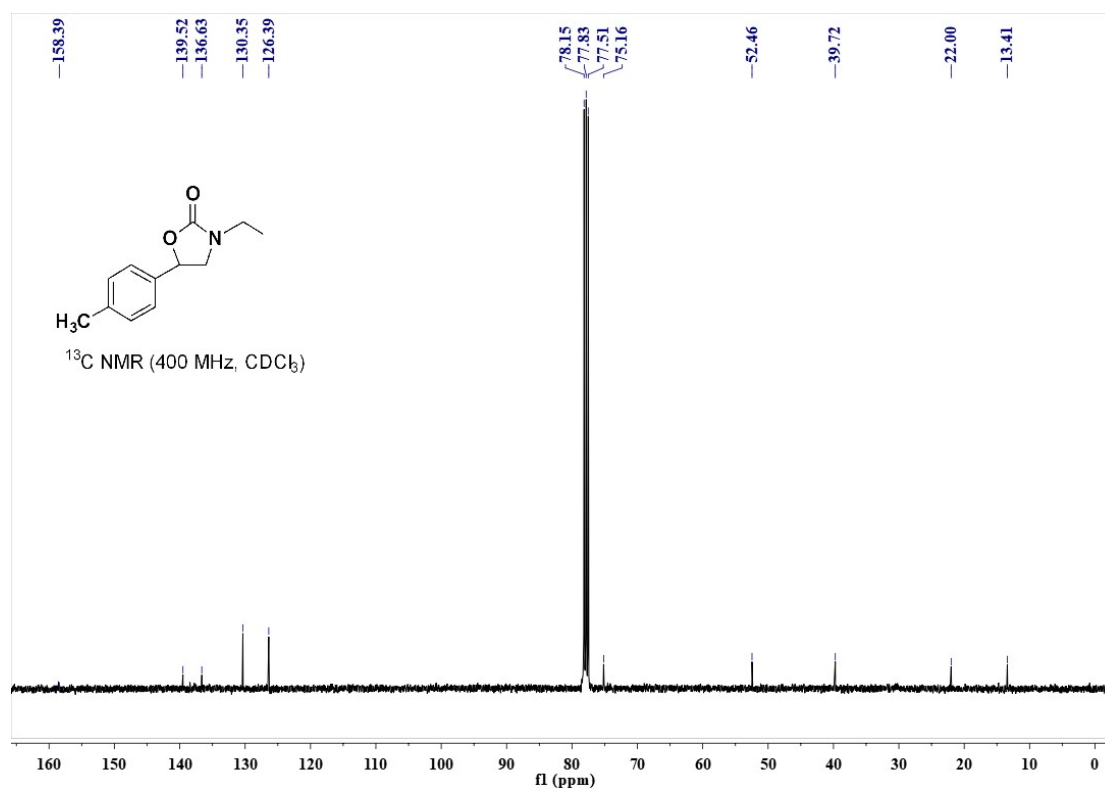

## 2-(4-chlorophenyl)-1-ethylaziridine

$^1\text{H}$  NMR (400 MHz,  $\text{CDCl}_3$ )  $\delta$  7.48 – 7.32 (m, 4H), 5.65 – 5.41 (m, 1H), 4.00 (t,  $J = 8.7$  Hz, 1H), 3.53 – 3.35 (m, 3H), 1.25 (t,  $J = 7.3$  Hz, 3H);  $^{13}\text{C}$  NMR (101 MHz,  $\text{CDCl}_3$ )  $\delta$  157.74 (s), 137.83 – 137.63 (m), 135.13 – 134.93 (m), 129.54 (s), 127.31 (s), 77.75 (s), 77.43 (s), 77.12 (s), 73.99 (s), 51.93 (s), 39.36 (s), 12.97 (s).

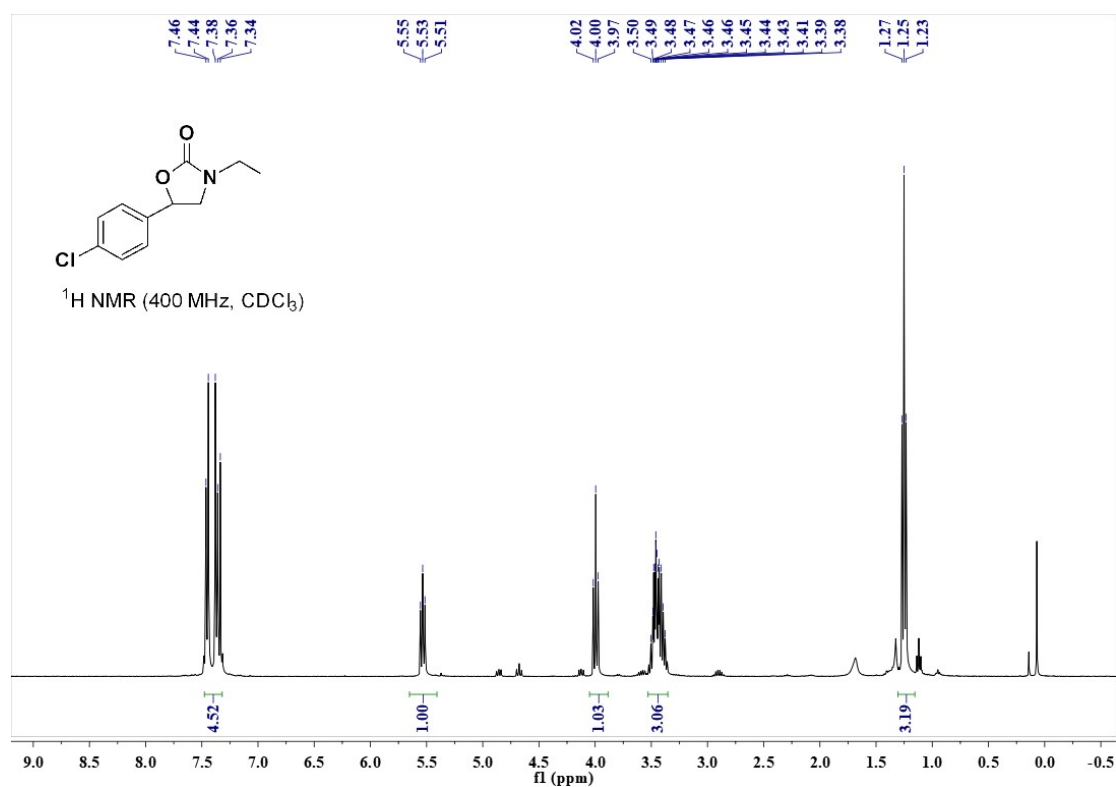

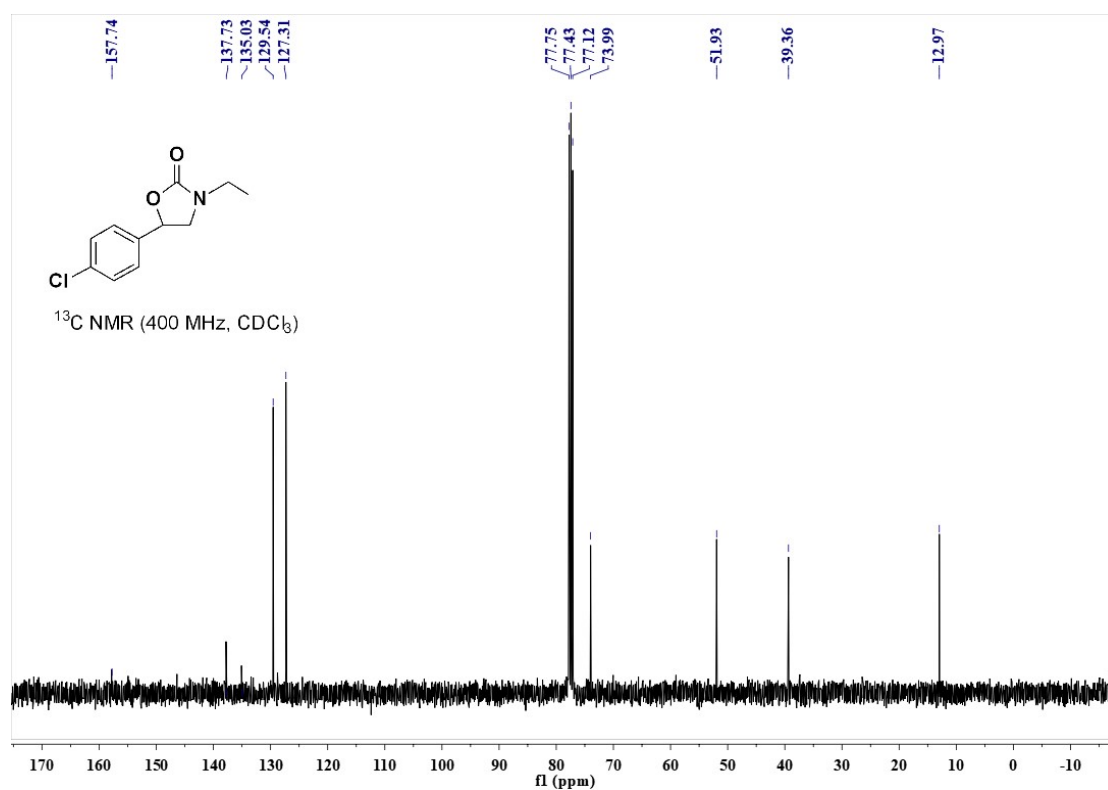

## 2-(4-bromophenyl)-1-ethylaziridine

<sup>1</sup>H NMR (400 MHz, CDCl<sub>3</sub>) δ 7.44 – 7.25 (m, 4H), 5.60 – 5.36 (m, 1H), 3.95 (t, *J* = 8.7 Hz, 1H), 3.48 – 3.14 (m, 3H), 1.20 (t, *J* = 7.3 Hz, 3H); <sup>13</sup>C NMR (101 MHz, CDCl<sub>3</sub>) δ 157.64 (s), 137.73 – 137.53 (m), 135.03 – 134.83 (m), 129.44 (s), 127.21 (s), 77.65 (s), 77.33 (s), 77.02 (s), 73.89 (s), 51.83 (s), 39.26 (s), 12.87 (s).

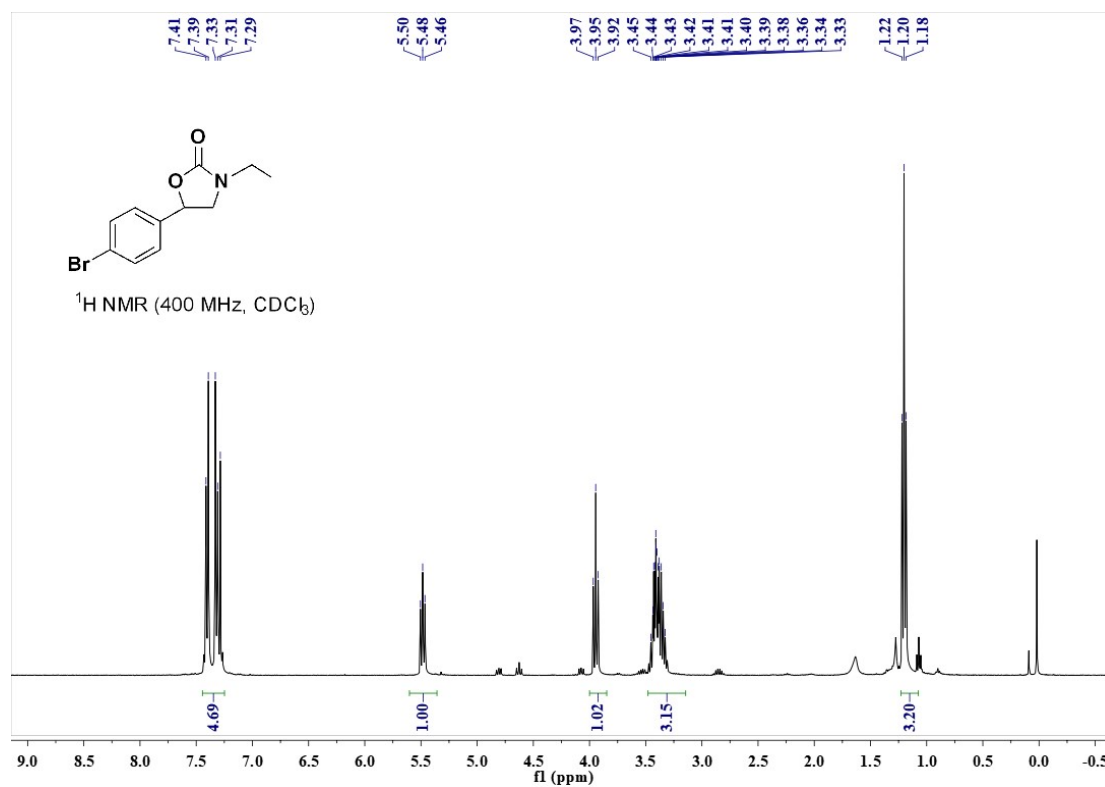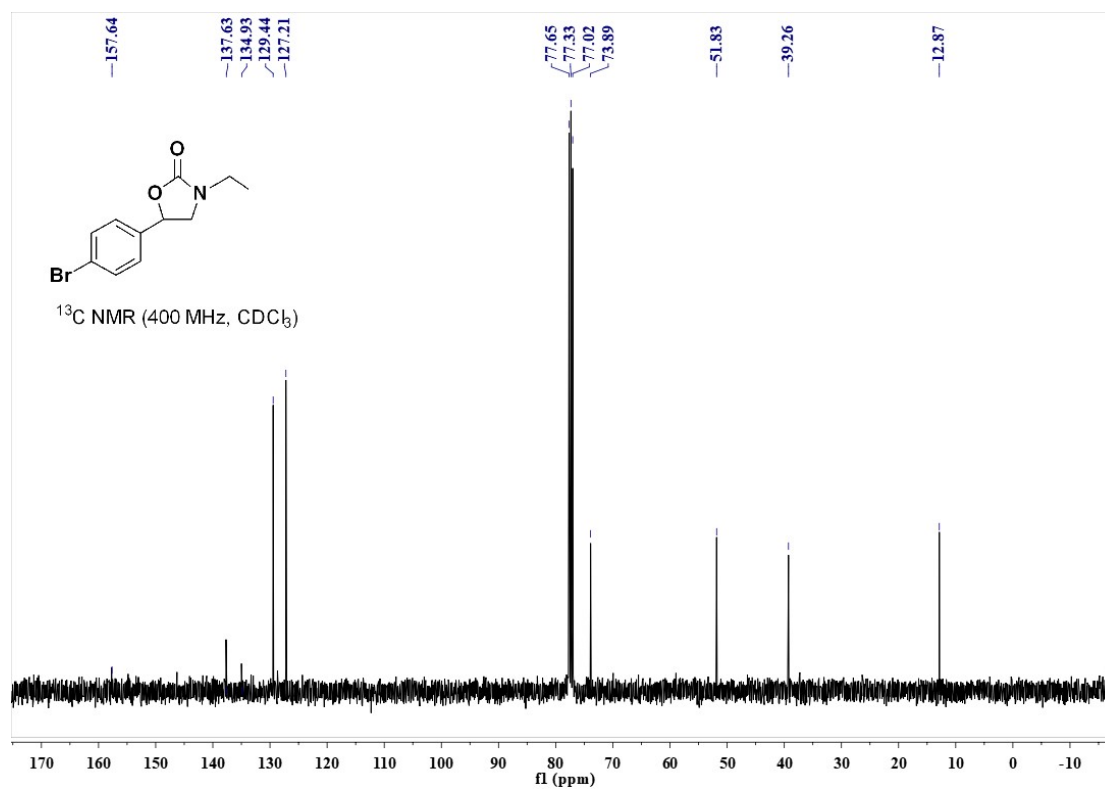

## References

- 1 Z. L. Wu, C. H. Wang, B. Zhao, J. Dong, F. Lu, W. H. Wang, W. C. Wang, G. J. Wu, J. Z. Cui and P. Cheng, *Angew. Chem. Int. Ed.*, 2016, **55**, 4938–4942.
